# Supplementary material
Source: PubMed Central journal article supplement (PMC2527921)
Supplement: 0805242105_0805242105SI.pdf [file 0805242105_0805242105SI.pdf]

# Supporting Information

Lo et al. 10.1073/pnas.0805242105

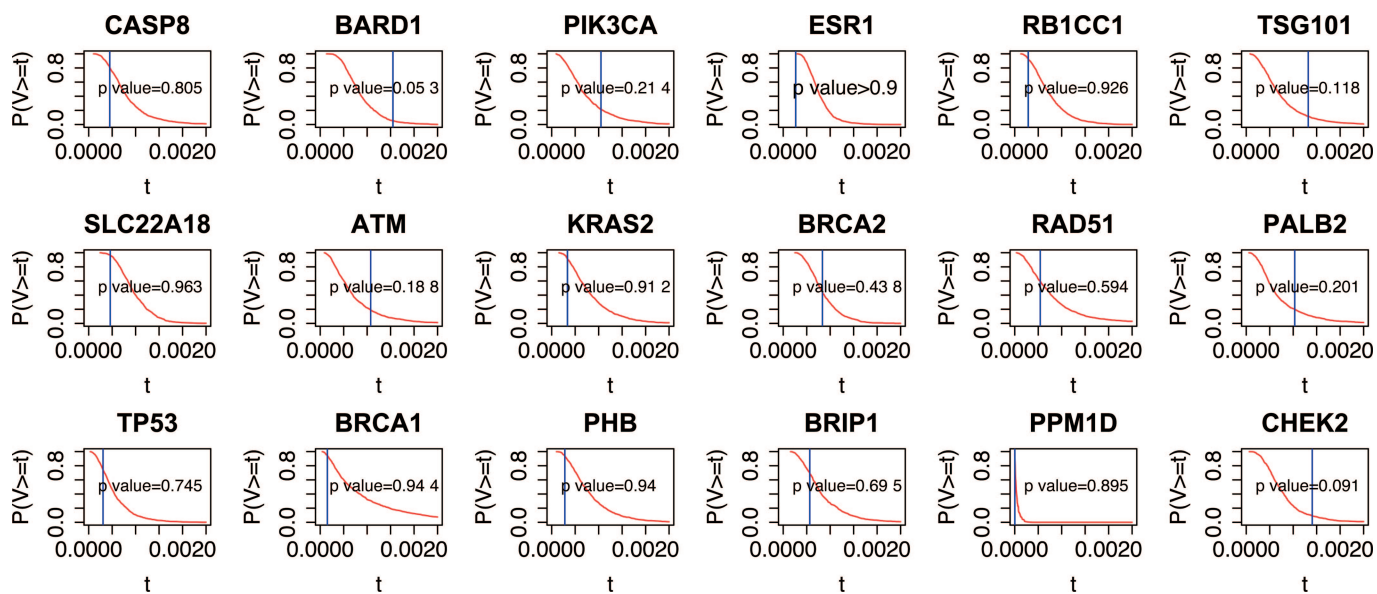

Fig. S1.  $P(V \geq t)$  under the null estimated by permutations and the  $P$  values of the observed marginal effects.

### Correlation between pvalue from curve method and rank method, meanratio

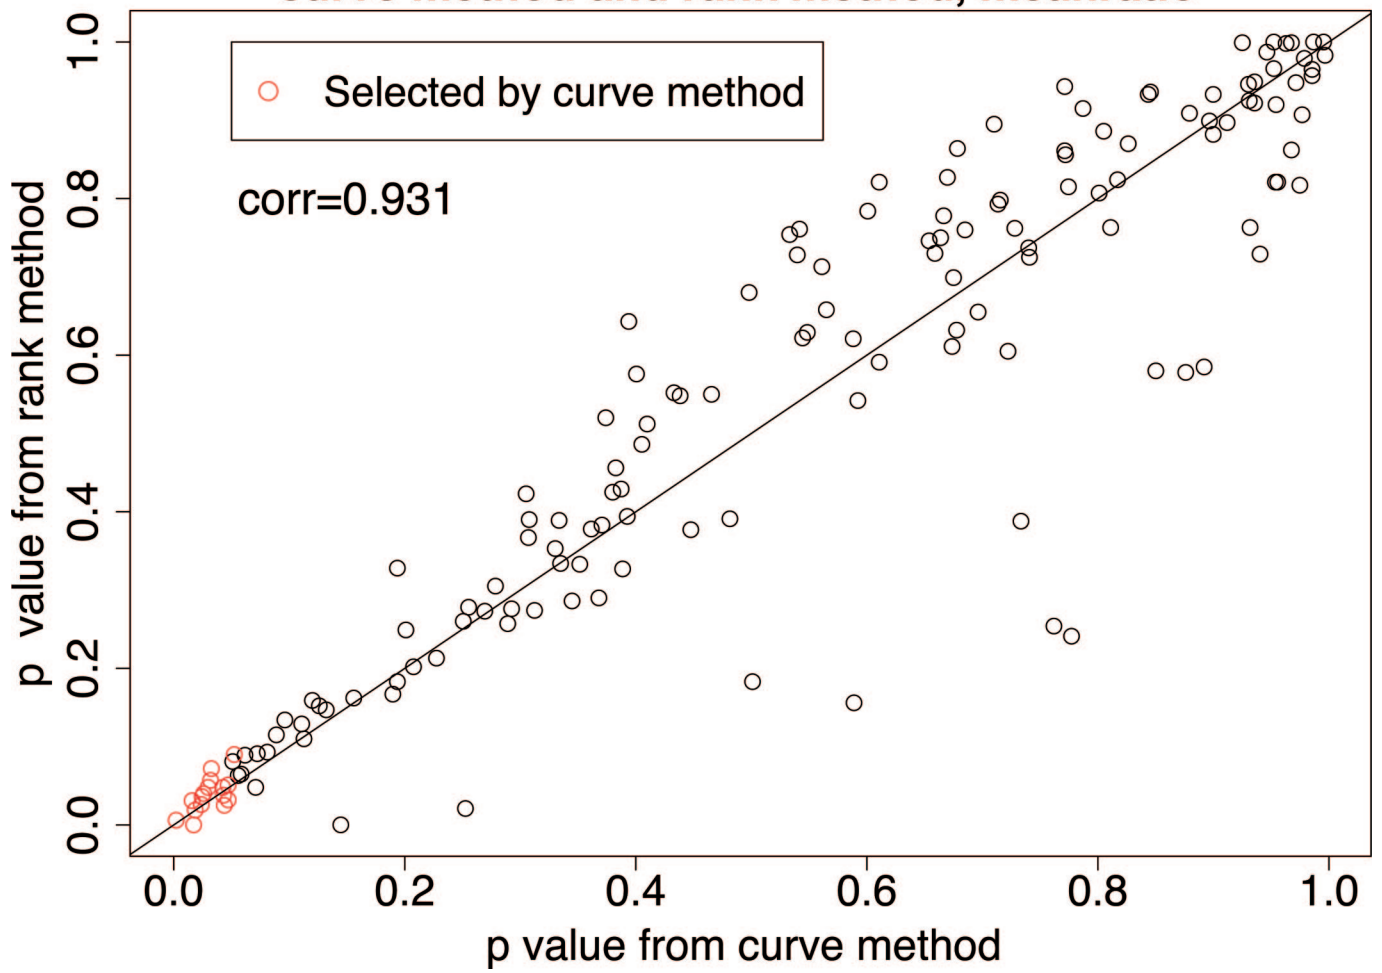

Fig. S2. Correlation between *P* values from the Curve and Rank methods, for Mean-ratio statistics.

### Correlation between pvalue from curve method and rank method, quantileratio

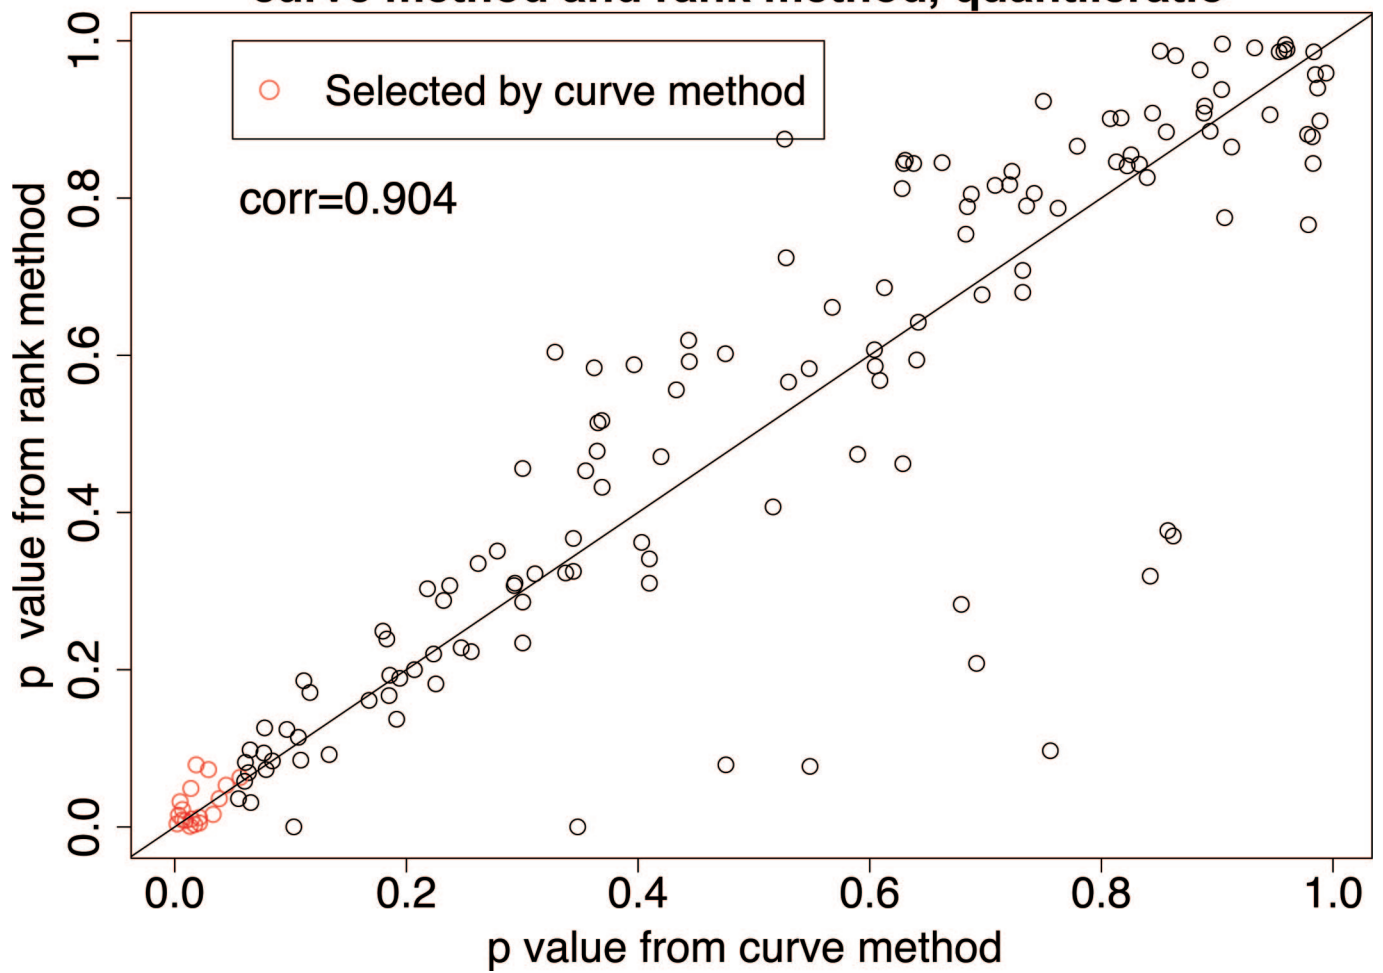

Fig. S3. Correlation between *P* values from the Curve and Rank methods, for Quantile-ratio statistics.

## (M,R)plane, 3way Interaction

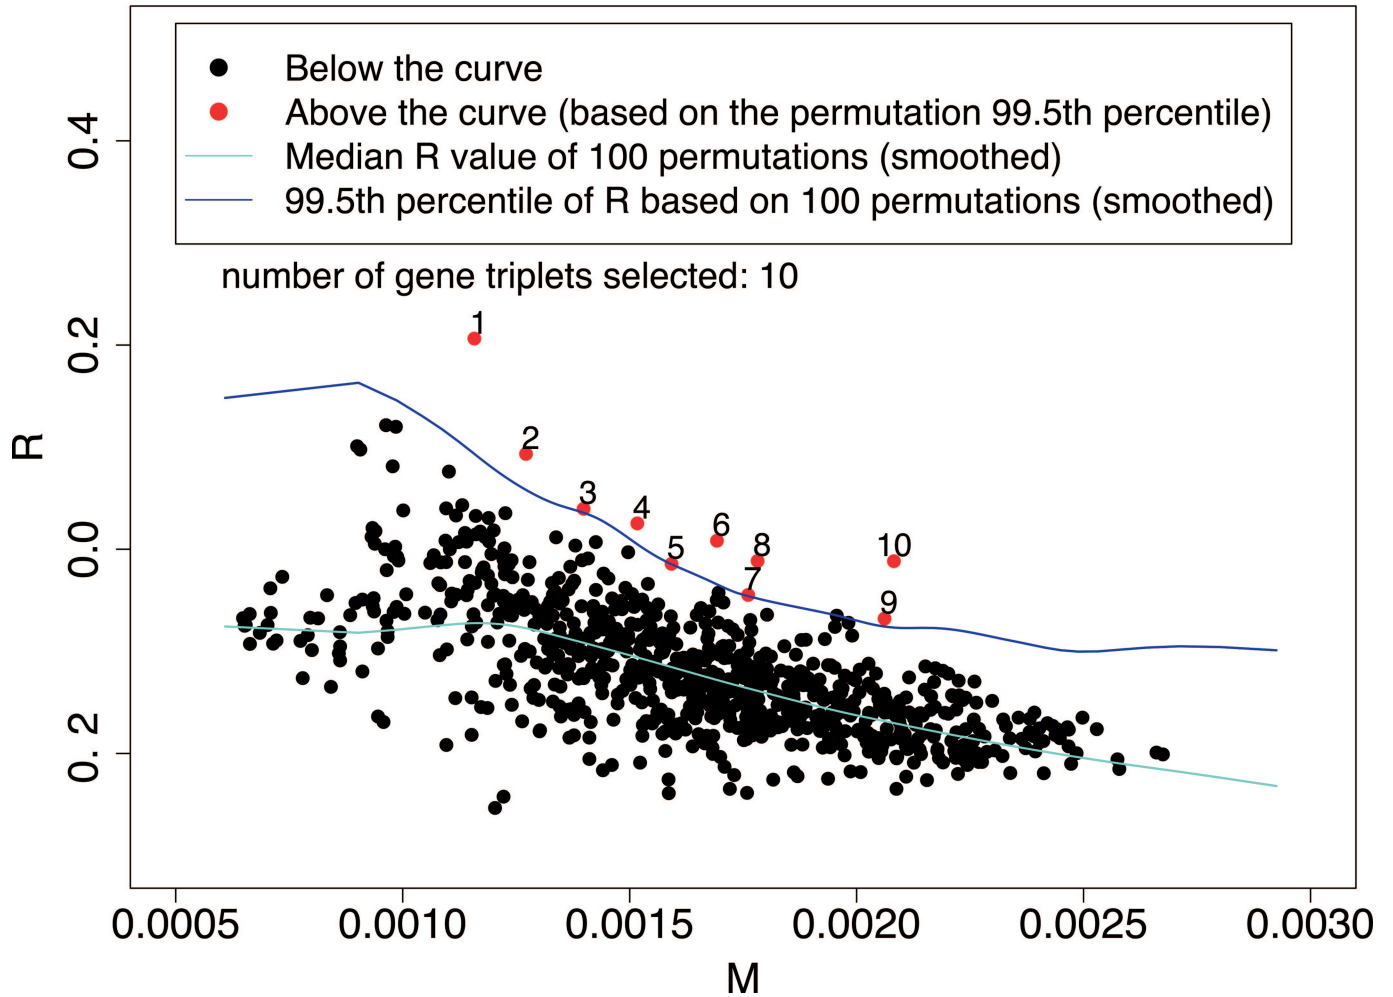

Fig. S4. ( $M, R$ ) plane: observed data and permutation quantiles, three-way interactions. 1, *RAD51 TP53 BRCA1*; 2, *SLC22A18 RAD51 BRCA1*; 3, *RB1CC1 BRCA1 PHB*; 4, *KRAS2 BRCA1 PPM1D*; 5, *RB1CC1 PALB2 BRCA1*; 6, *ESR1 KRAS2 BRCA1*; 7, *KRAS2 BRCA1 BRIP1*; 8, *PALB2 BRCA1 PHB*; 9, *BARD1 BRCA1 PHB*; 10, *KRAS2 BRCA1 CHEK2*.

## (M,Q)plane, 3way Interaction

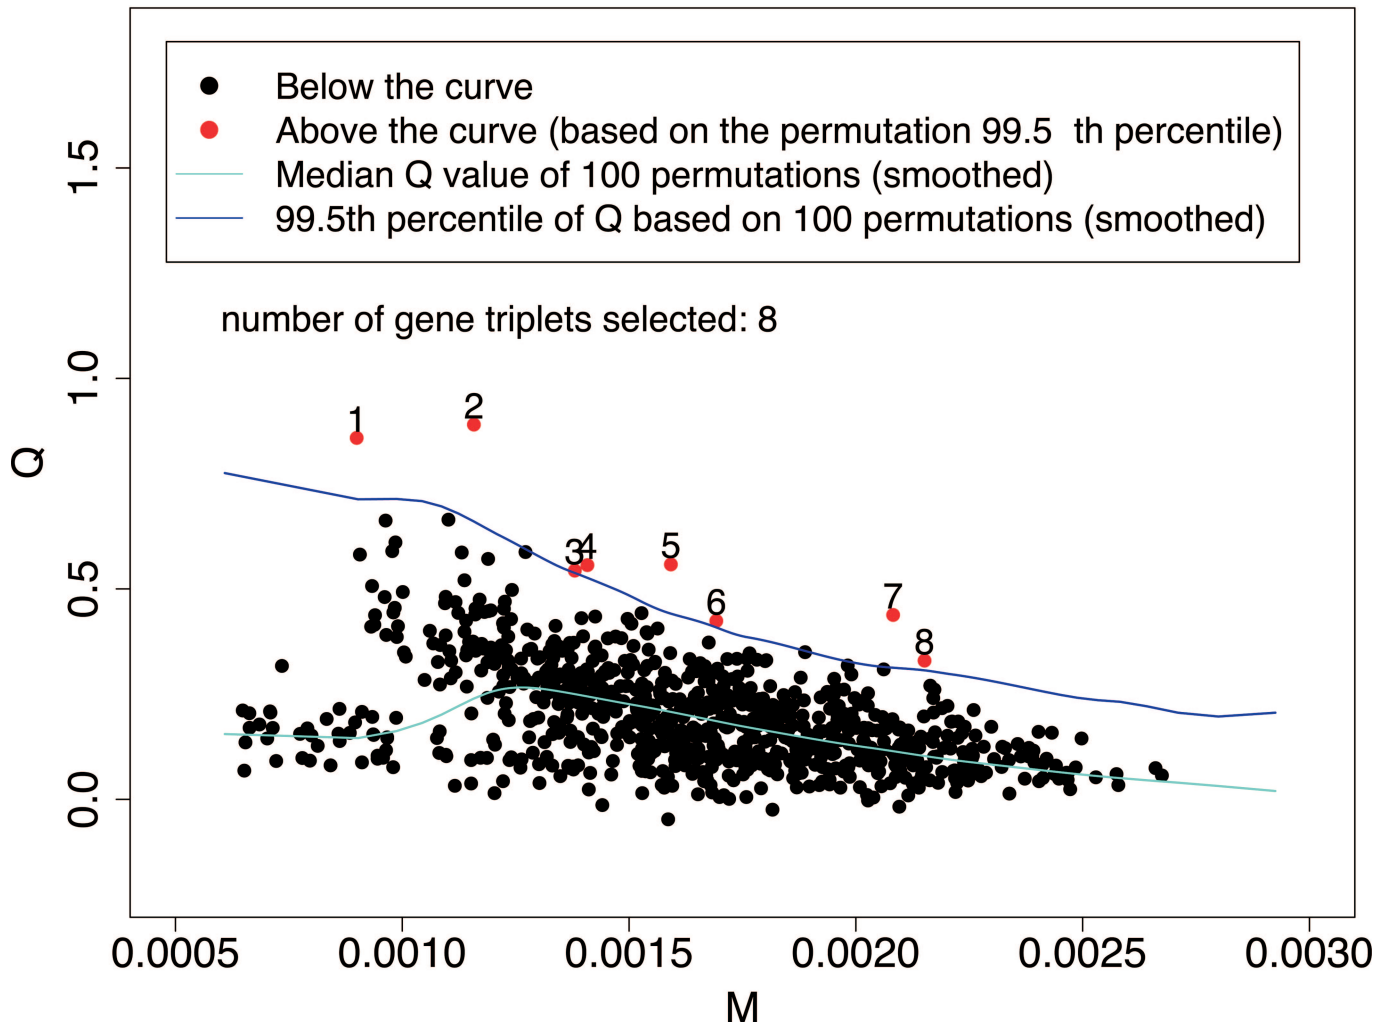

Fig. S5. (M, Q) plane: observed data and permutation quantiles, three-way interactions. 1, *CASP8 TP53 BRCA1*; 2, *RAD51 TP53 BRCA1*; 3, *CASP8 PALB2 BRCA1*; 4, *RAD51 PALB2 BRCA1*; 5, *RB1CC1 PALB2 BRCA1*; 6, *ESR1 KRAS2 BRCA1*; 7, *KRAS2 BRCA1 CHEK2*; 8, *BARD1 TSG101 BRCA1*.



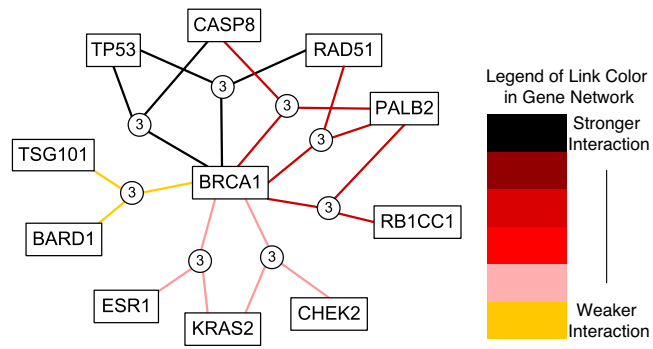

Fig. S7. Three-way interaction network based on eight genes identified by quantile-ratio method.
